# Supplementary material
Source: MDPI journal article supplement (https://www.mdpi.com/search?q=pharmaceuticals-13-00391)

SUPPLEMENTARY MATERIALS

**Novel 1-amidino-4-phenylpiperazines as potent agonists at human TAAR1 receptor: rational design, synthesis, biological evaluation and molecular docking studies**

Valeria Francesconi <sup>1</sup>, Elena Cichero <sup>1,\*</sup>, Evgeny V. Kanov <sup>2</sup>, Erik Laurini <sup>3</sup>, Sabrina Pricl <sup>3,4</sup>, Raul R. Gainetdinov <sup>2,5</sup> and Michele Tonelli <sup>1,\*</sup>

**Table S1.** Chemical structure and biological activity of 2-aminoxazolines (**1b-37b**) acting as *h*TAAR1 agonists previously exploited for QSAR analyses [30].

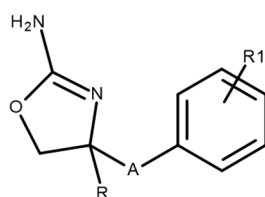

| Comp.      | R               | A                                                 | R1   | Configuration | pEC <sub>50</sub> (M) |
|------------|-----------------|---------------------------------------------------|------|---------------|-----------------------|
| <b>1b</b>  | H               | -CH <sub>2</sub> -                                | 2-Cl | <i>S</i>      | 6.81                  |
| <b>2b</b>  | H               | -CH <sub>2</sub> -                                | H    | <i>S</i>      | 6.48                  |
| <b>3b</b>  | H               | -CH <sub>2</sub> -                                | H    | <i>R</i>      | 5.54                  |
| <b>4b</b>  | H               | -CH <sub>2</sub> CH <sub>2</sub> -                | 3-Cl | <i>S</i>      | 7.74                  |
| <b>5b</b>  | H               | -CH <sub>2</sub> CH <sub>2</sub> -                | H    | <i>S</i>      | 7.57                  |
| <b>6b</b>  | CH <sub>3</sub> | -CH <sub>2</sub> CH <sub>2</sub> -                | 3-Cl | <i>S</i>      | 6.48                  |
| <b>7b</b>  | H               | -CH <sub>2</sub> O-                               | 3-Cl | <i>S</i>      | 6.57                  |
| <b>8b</b>  | H               | -CH <sub>2</sub> NH-                              | 3-Cl | <i>S</i>      | 6.24                  |
| <b>9b</b>  | H               | -CH <sub>2</sub> NCH <sub>3</sub> -               | 3-Cl | <i>S</i>      | 7.57                  |
| <b>10b</b> | H               | -CH <sub>2</sub> NC <sub>2</sub> H <sub>5</sub> - | 3-Cl | <i>S</i>      | 7.54                  |
| <b>11b</b> | H               | -CH <sub>2</sub> NC <sub>2</sub> H <sub>5</sub> - | H    | <i>S</i>      | 7.23                  |
| <b>12b</b> | H               | -CH <sub>2</sub> N <sup><i>i</i></sup> Pr-        | H    | <i>S</i>      | 6.85                  |
| <b>13b</b> | H               | -CH <sub>2</sub> NC <sub>2</sub> H <sub>5</sub> - | H    | <i>R</i>      | 6.64                  |

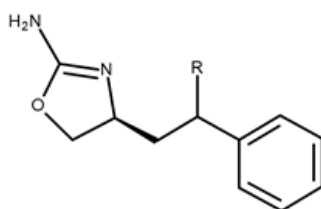

| Comp.      | R                                          | pEC <sub>50</sub> (M) |
|------------|--------------------------------------------|-----------------------|
| <b>14b</b> | ( <i>S</i> )-CH <sub>3</sub>               | 5.81                  |
| <b>15b</b> | ( <i>R</i> )-CH <sub>3</sub>               | 6.14                  |
| <b>16b</b> | ( <i>S</i> )-C <sub>2</sub> H <sub>5</sub> | 7.74                  |
| <b>17b</b> | ( <i>R</i> )-C <sub>2</sub> H <sub>5</sub> | 5.65                  |

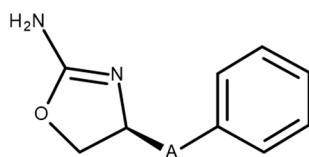

| Comp.      | A                                                  | pEC <sub>50</sub> (M) |
|------------|----------------------------------------------------|-----------------------|
| <b>18b</b> | -CH <sub>2</sub> CH <sub>2</sub> CH <sub>2</sub> - | 7.57                  |
| <b>19b</b> | -CH <sub>2</sub> OCH <sub>2</sub> -                | 6.44                  |
| <b>20b</b> | -CH <sub>2</sub> CH <sub>2</sub> O-                | 8.05                  |

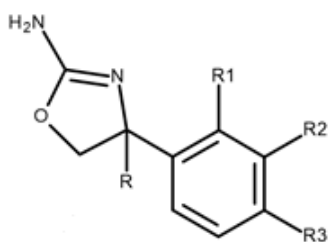

| Comp.      | R               | R1                              | R2  | R3 | Configuration | pEC <sub>50</sub> (M) |
|------------|-----------------|---------------------------------|-----|----|---------------|-----------------------|
| <b>21b</b> | H               | H                               | H   | H  | <i>S</i>      | 7.17                  |
| <b>22b</b> | H               | Cl                              | H   | H  | <i>S</i>      | 7.64                  |
| <b>23b</b> | H               | H                               | Cl  | H  | <i>S</i>      | 7.68                  |
| <b>24b</b> | H               | H                               | H   | Cl | <i>S</i>      | 6.84                  |
| <b>25b</b> | H               | H                               | Cl  | Cl | <i>S</i>      | 7.51                  |
| <b>26b</b> | H               | H                               | H   | Br | <i>S</i>      | 6.82                  |
| <b>27b</b> | H               | H                               | H   | Br | <i>R</i>      | 5.00                  |
| <b>28b</b> | CH <sub>3</sub> | Cl                              | H   | H  | <i>S</i>      | 6.78                  |
| <b>29b</b> | CH <sub>3</sub> | H                               | H   | Br | <i>S</i>      | 7.39                  |
| <b>30b</b> | H               | H                               | H   | Ph | <i>S</i>      | 5.57                  |
| <b>31b</b> | H               | H                               | OPh | H  | <i>R/S</i>    | 5.71                  |
| <b>32b</b> | H               | H                               | F   | H  | <i>S</i>      | 6.31                  |
| <b>33b</b> | H               | CH <sub>3</sub>                 | H   | H  | <i>S</i>      | 7.17                  |
| <b>34b</b> | H               | CH <sub>3</sub>                 | H   | Cl | <i>S</i>      | 7.96                  |
| <b>35b</b> | H               | CH <sub>2</sub> CH <sub>3</sub> | H   | Cl | <i>S</i>      | 7.59                  |
| <b>36b</b> | H               | <i>c</i> Pr                     | H   | Cl | <i>S</i>      | 7.92                  |
| <b>37b</b> | H               | CH <sub>3</sub>                 | F   | H  | <i>S</i>      | 7.77                  |

**Table S2.** Table of scoring functions for the selected docking poses of the discussed *hTAAR1* agonists.

| Compound   | S        | E_conf    | E_place  | E_score1 | E_refine | E_score2 |
|------------|----------|-----------|----------|----------|----------|----------|
| <b>20b</b> | -99.1078 | -109.1025 | -10.3802 | -5.6912  | -33.6487 | -99.1078 |
| <b>26b</b> | -96.2118 | -108.1425 | -10.5221 | -5.1112  | -31.4564 | -96.2118 |
| <b>27b</b> | -87.6534 | -102.8943 | -8.9768  | -6.7823  | -28.8635 | -87.6534 |
| <b>30b</b> | -84.7643 | -107.8932 | -9.0065  | -7.6523  | -28.6522 | -84.7643 |
| <b>1</b>   | -85.7222 | -319.0324 | -11.0525 | -5.1549  | -22.5136 | -85.7222 |
| <b>2</b>   | -94.6754 | -310.7677 | -11.0066 | -6.4366  | -28.9887 | -94.6754 |
| <b>6</b>   | -94.5612 | -280.4532 | -12.6753 | -5.7821  | -27.9911 | -94.5612 |
| <b>15</b>  | -95.0332 | -281.8556 | -12.7560 | -6.2340  | -29.0032 | -95.0332 |
| <b>PEA</b> | -95.8775 | -109.6754 | -9.6544  | -4.7865  | -27.7765 | -95.8775 |

**Figure S1.** Docking positioning of the oxazoline derivative **20b** (C atom, yellow) and  $\beta$ -PEA (C atom; green) at the *hTAAR1* putative binding site. Ligands are shown in sticks. The most relevant residues are labelled.

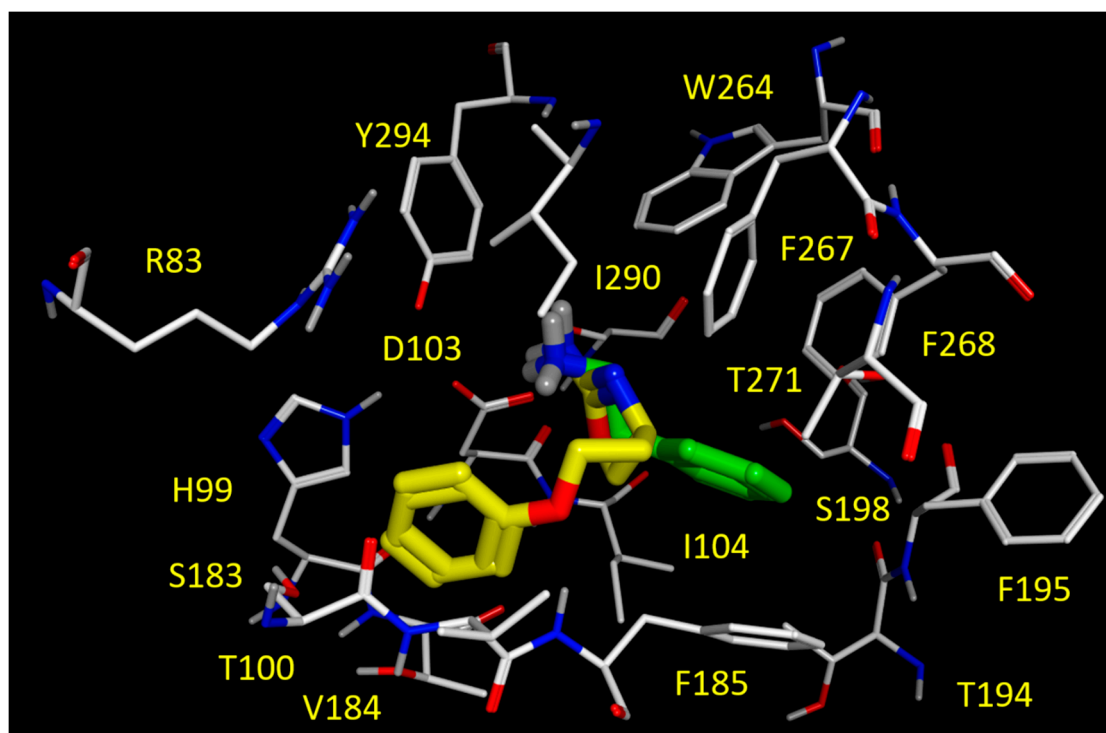

**Figure S2.** Docking positioning of the oxazoline derivative **30b** at the *hTAAR1* putative binding site is shown as ligplot. The most relevant residues are labelled, being represented the most relevant H-bonds experienced by the agonist.

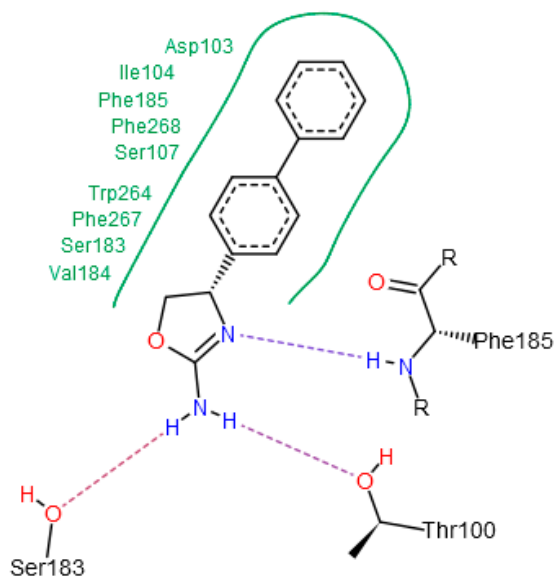

**Figure S3.** Docking positioning of the amidine derivative **1** (C atom, yellow) and **PEA** (C atom; green) at the *hTAAR1* putative binding site. Ligands are shown in sticks. The most relevant residues are labelled.

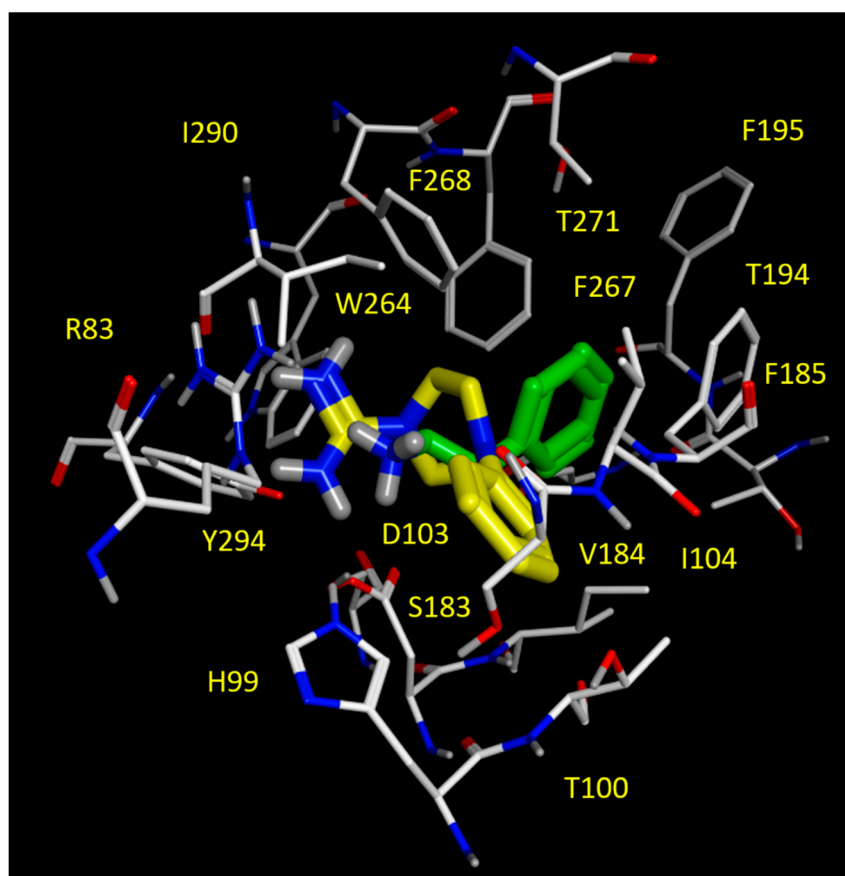

**Figure S4.** Docking positioning of the amidine derivative **2** (C atom, orange) and **15** (C atom; magenta) at the *h*TAAR1 putative binding site. Ligands are shown in sticks. The most relevant residues are labelled.

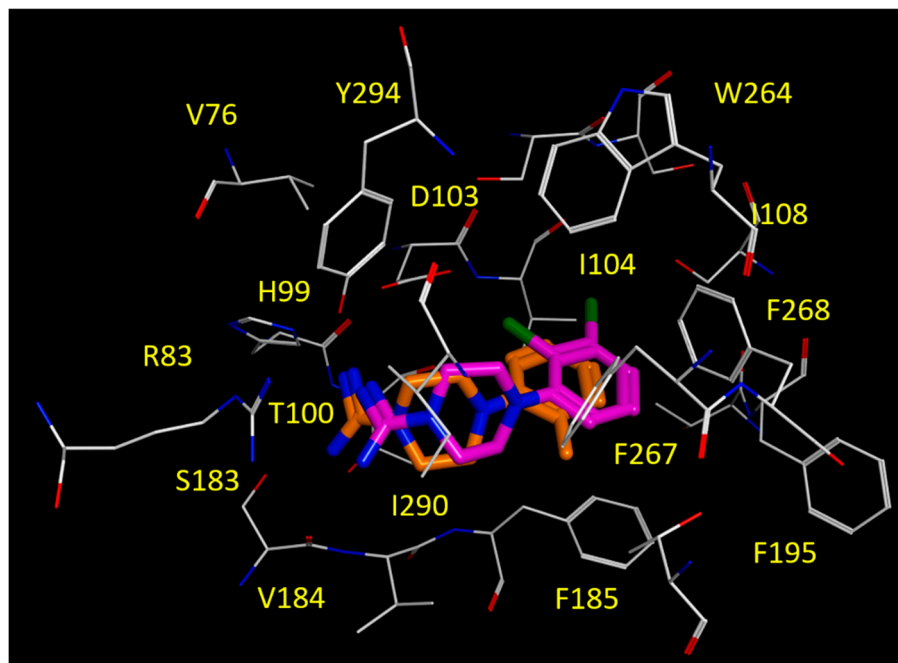

**Table S3.** Analysis of the ChEMBL database depending on different similarity thresholds to the present 1-amidino-4-phenylpiperazines **1-16**.

| Compounds | First similar structures from ChEMBL database                                                                   |
|-----------|-----------------------------------------------------------------------------------------------------------------|
|           | <p data-bbox="927 1368 1158 1406">Similarity 67.74%</p> <p data-bbox="927 1585 1158 1624">Similarity 66.66%</p> |
|           | <p data-bbox="895 1944 1190 2027">Threshold: 60%<br/>no records were found</p>                                  |

|                                                                                                                                 |                                                                                                                                                                                                                                                                                                                                                                                        |
|---------------------------------------------------------------------------------------------------------------------------------|----------------------------------------------------------------------------------------------------------------------------------------------------------------------------------------------------------------------------------------------------------------------------------------------------------------------------------------------------------------------------------------|
| 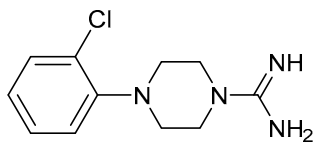 <p style="text-align: center;"><b>3</b></p>   | <p style="text-align: center;">Similarity 71.42%</p>  <p style="text-align: center;">CHEMBL4172220 *</p>                                                                                                                                                                                             |
|  <p style="text-align: center;"><b>4</b></p>   | <p style="text-align: center;">Similarity 73.68%</p>  <p style="text-align: center;">CHEMBL4163065 *</p>                                                                                                                                                                                             |
|  <p style="text-align: center;"><b>5</b></p> | <p style="text-align: center;">Similarity 100.0%</p>  <p style="text-align: center;">CHEMBL1215544</p> <p style="text-align: center;">Similarity 70.59%</p>  <p style="text-align: center;">CHEMBL4173769 *</p> |
|  <p style="text-align: center;"><b>6</b></p> | <p style="text-align: center;">Similarity 74.36%</p>  <p style="text-align: center;">CHEMBL4169509 *</p>                                                                                                                                                                                           |
|  <p style="text-align: center;"><b>7</b></p> | <p style="text-align: center;">Similarity 75.0%</p>  <p style="text-align: center;">CHEMBL4177366 *</p>                                                                                                                                                                                            |

|                                                                                                                                  |                                                                                                                                                                                                                                                                                                                                                                                     |
|----------------------------------------------------------------------------------------------------------------------------------|-------------------------------------------------------------------------------------------------------------------------------------------------------------------------------------------------------------------------------------------------------------------------------------------------------------------------------------------------------------------------------------|
| 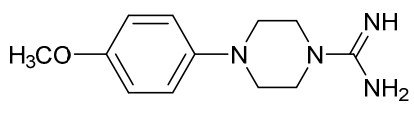 <p style="text-align: center;"><b>8</b></p>    | <p style="text-align: center;">Similarity 72.97 %</p>  <p style="text-align: center;">CHEMBL4172905 *</p>                                                                                                                                                                                         |
|  <p style="text-align: center;"><b>9</b></p>    | <p style="text-align: center;">Similarity 75.61%</p>  <p style="text-align: center;">CHEMBL4161604 *</p>                                                                                                                                                                                          |
|  <p style="text-align: center;"><b>10</b></p>  | <p style="text-align: center;">Similarity 72.97%</p>  <p style="text-align: center;">CHEMBL4162232</p> <p style="text-align: center;">Similarity 71.43%</p>  <p style="text-align: center;">CHEMBL296963</p> |
|  <p style="text-align: center;"><b>11</b></p> | <p style="text-align: center;">Similarity 68.0%</p>  <p style="text-align: center;">CHEMBL4162640</p>                                                                                                                                                                                           |
|  <p style="text-align: center;"><b>12</b></p> | <p style="text-align: center;">Threshold: 60%</p> <p style="text-align: center;">no records were found</p>                                                                                                                                                                                                                                                                          |
|  <p style="text-align: center;"><b>13</b></p> | <p style="text-align: center;">Similarity 59.46%</p>  <p style="text-align: center;">CHEMBL1463766</p>                                                                                                                                                                                          |

|                                                                                                                                |                                                                                                                                                                                          |
|--------------------------------------------------------------------------------------------------------------------------------|------------------------------------------------------------------------------------------------------------------------------------------------------------------------------------------|
| 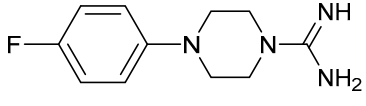 <p style="text-align: center;"><b>14</b></p> | <p style="text-align: center;">Similarity 68.75 %</p>  <p style="text-align: right;">CHEMBL1215544</p> |
|  <p style="text-align: center;"><b>15</b></p> | <p style="text-align: center;">Threshold: 70%<br/>no records were found</p>                                                                                                              |
|  <p style="text-align: center;"><b>16</b></p> | <p style="text-align: center;">Threshold: 70%<br/>no records were found</p>                                                                                                              |

\* Piperazino-based biguanides (SET2) previously synthesized by the Authors; see REF 31 (CHEMBL4145505): Guariento, S.; Tonelli, M.; Espinoza, S.; Gerasimov, A.S.; Gainetdinov, R.R.; Cichero, E. Rational design, chemical synthesis and biological evaluation of novel biguanides exploring species-specificity responsiveness of TAAR1 agonists. *Eur. J. Med. Chem.* **2018**, *146*, 146 171-184



$^1\text{H}$  and  $^{13}\text{C}$  NMR spectra of 4-(2-Chlorophenyl)piperazine-1-carboximidamide hydrochloride (3)

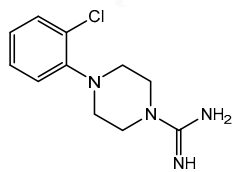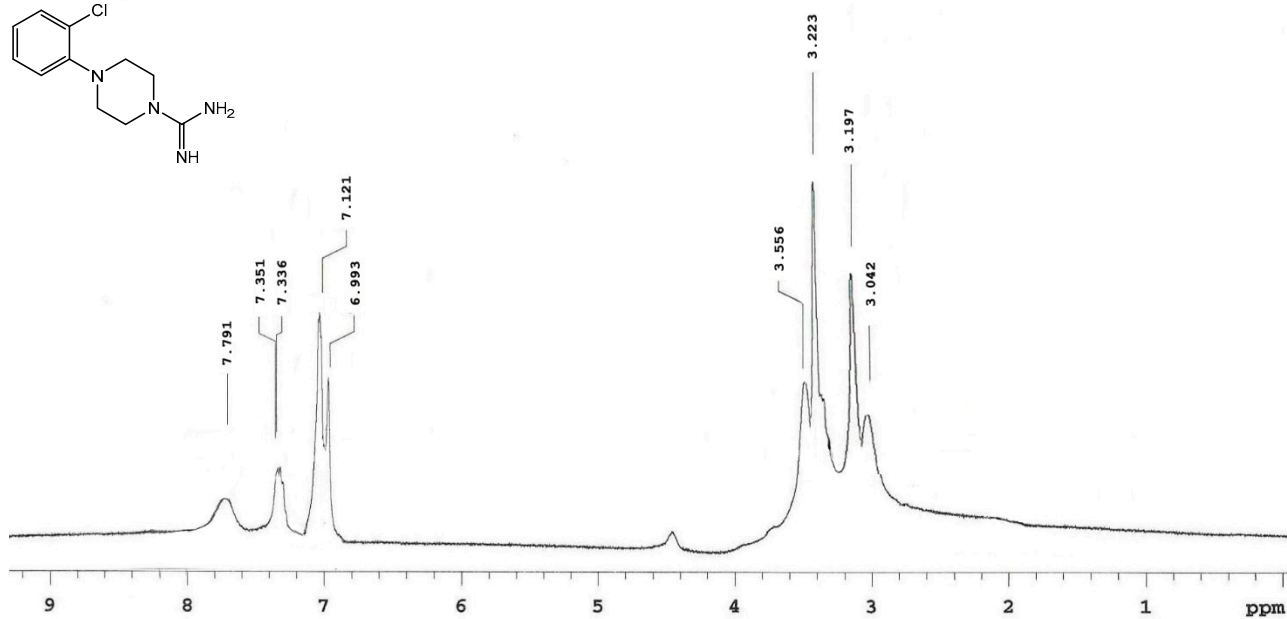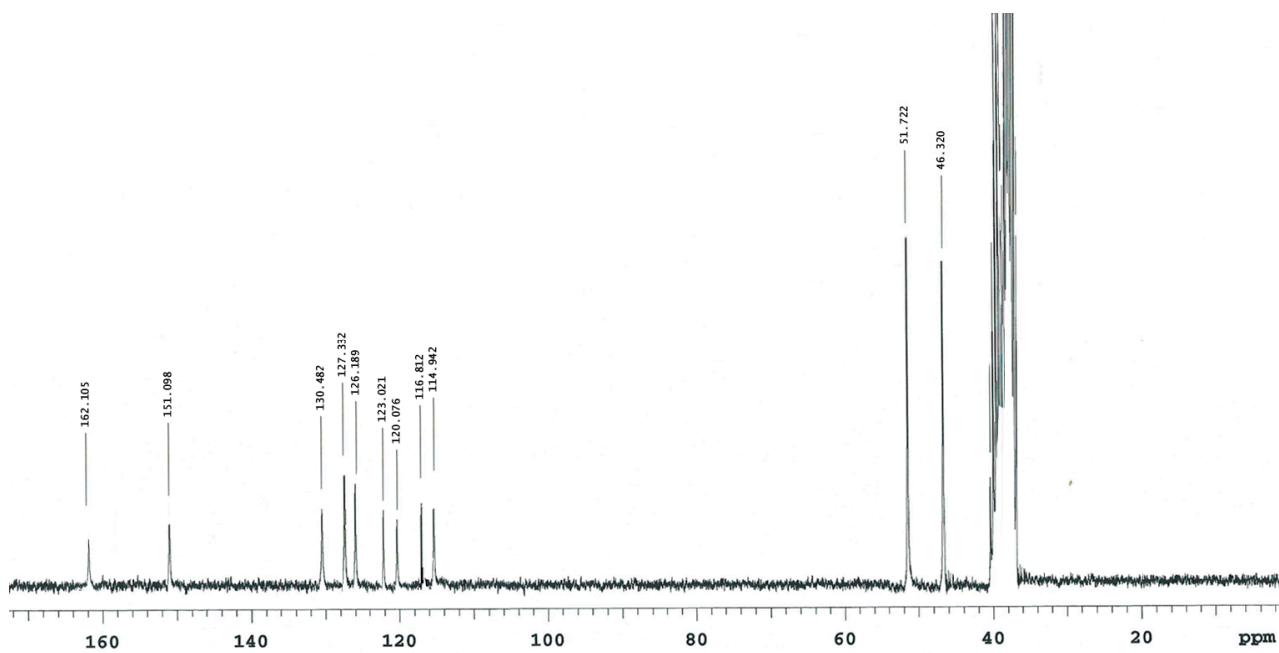

$^1\text{H}$  and  $^{13}\text{C}$  NMR spectra of 4-(2-Methoxyphenyl)piperazine-1-carboximidamide hydrochloride (6)

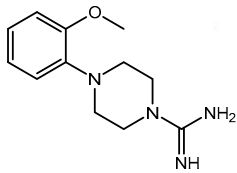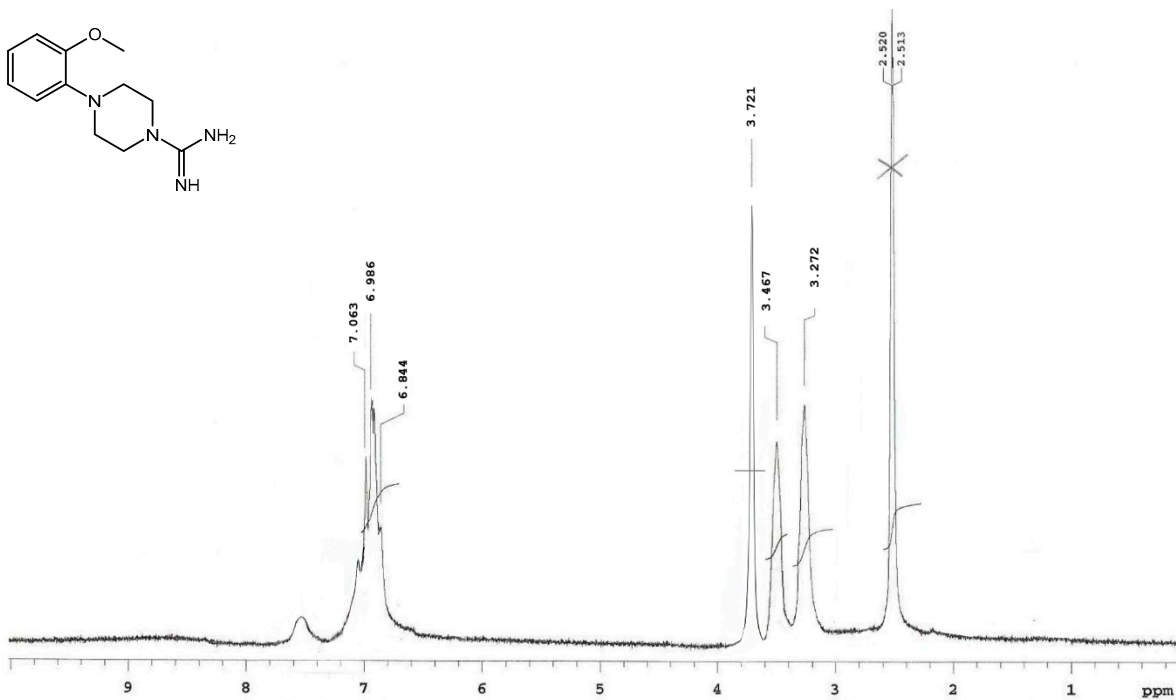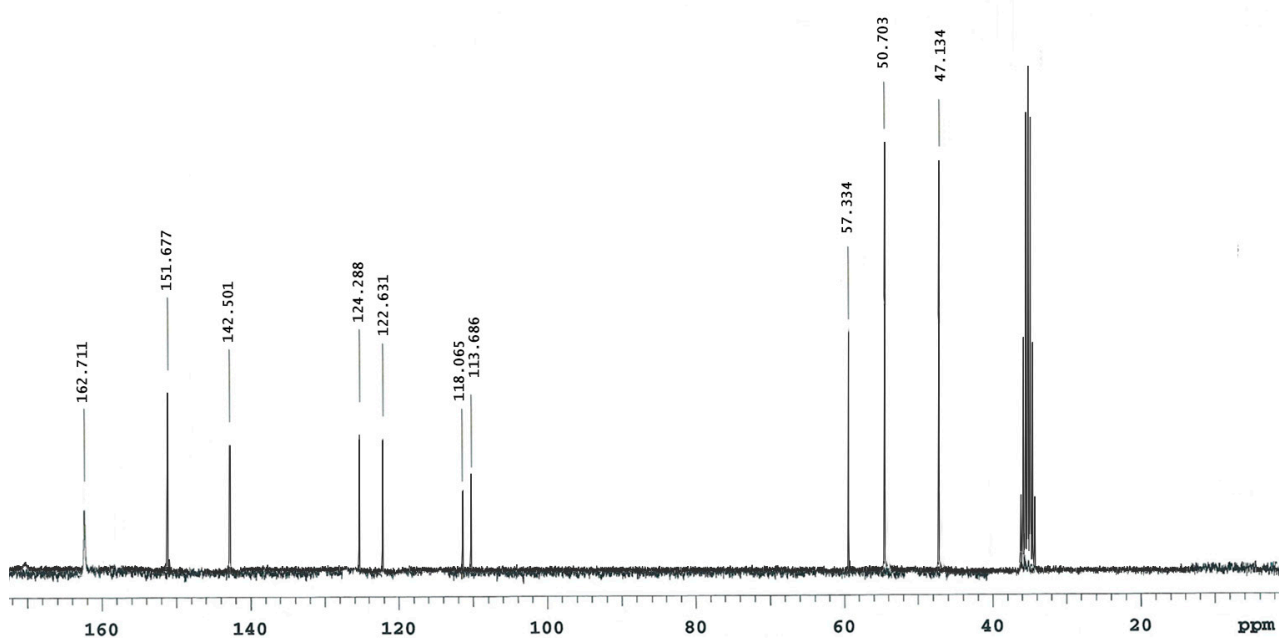

$^1\text{H}$  and  $^{13}\text{C}$  NMR spectra of 4-(3-Methoxyphenyl)piperazine-1-carboximidamide hydrochloride (7)

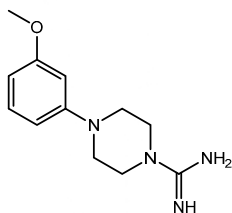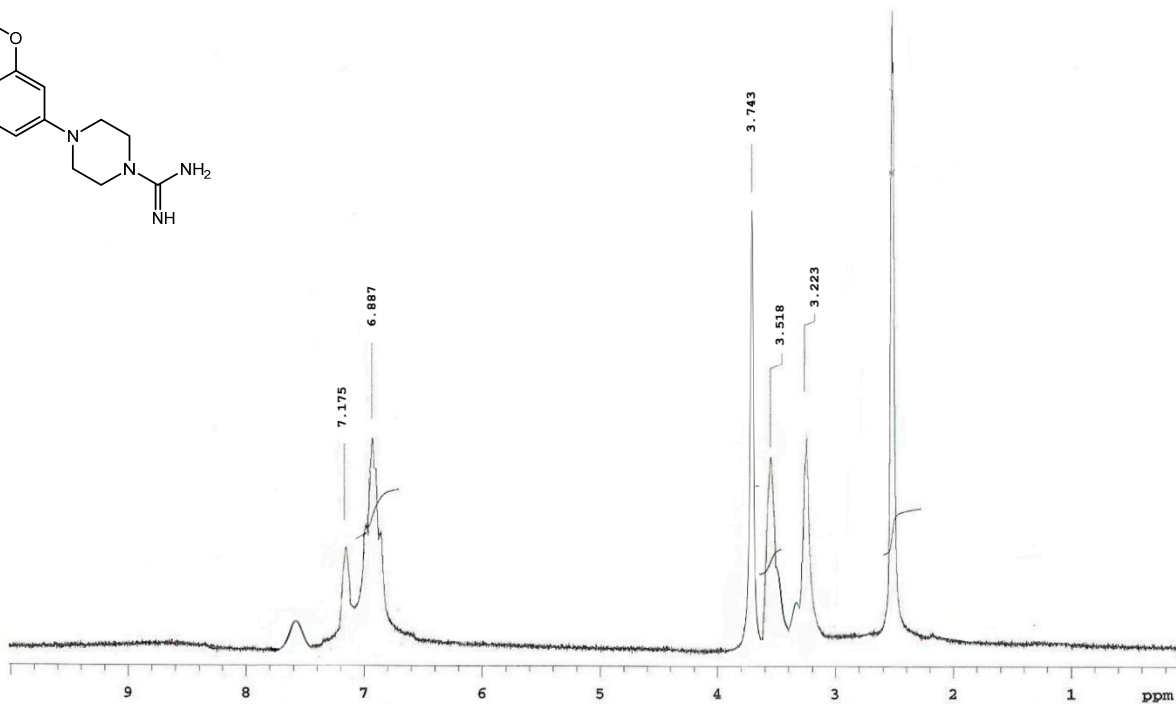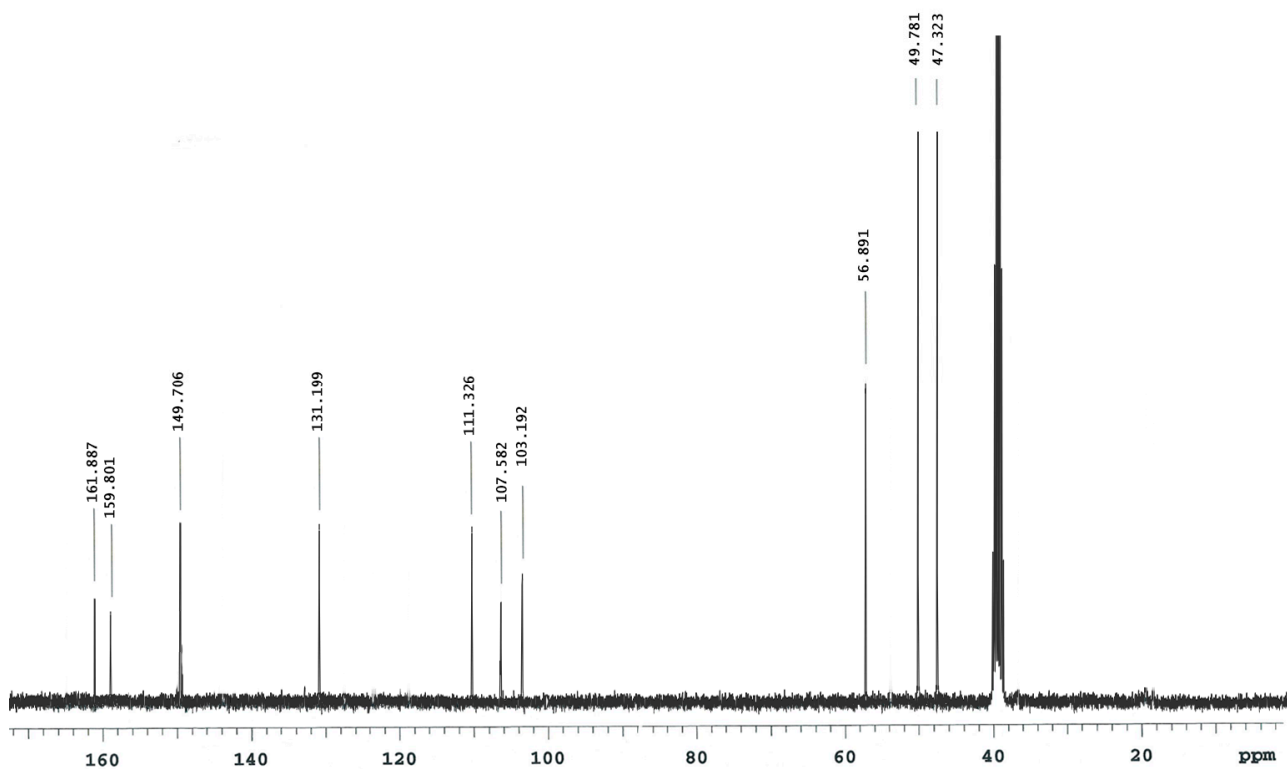

$^1\text{H}$  and  $^{13}\text{C}$  NMR spectra of 4-(3-trifluorophenyl)piperazine-1-carboximidamide hydrochloride (9)

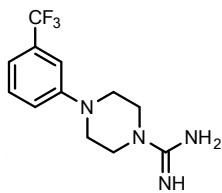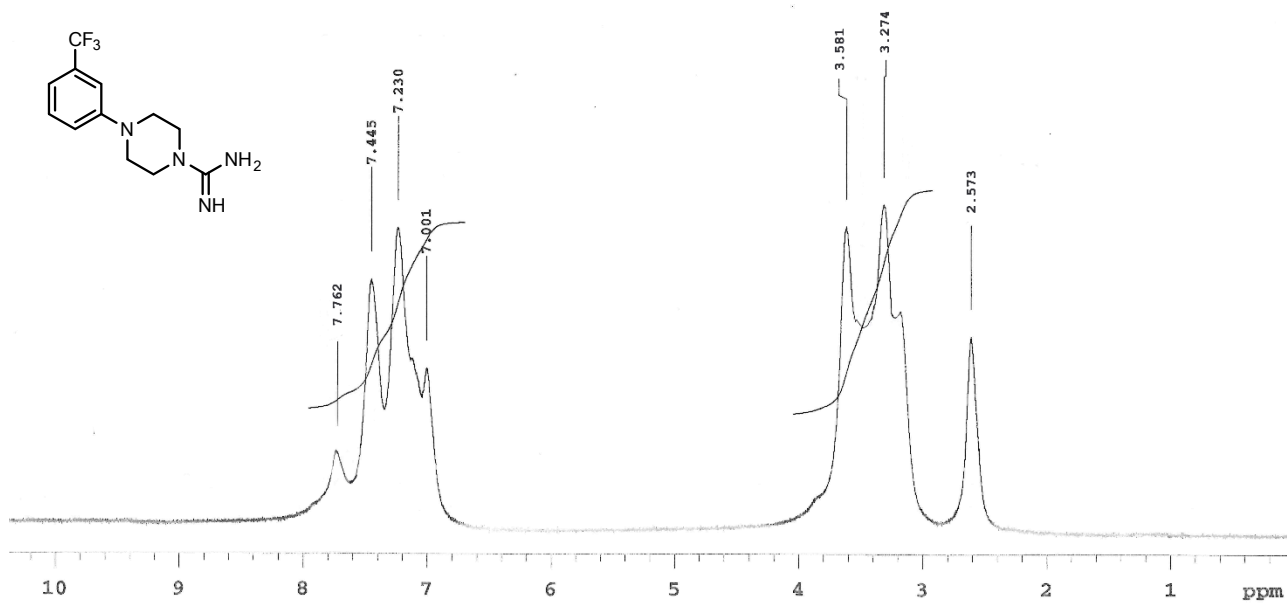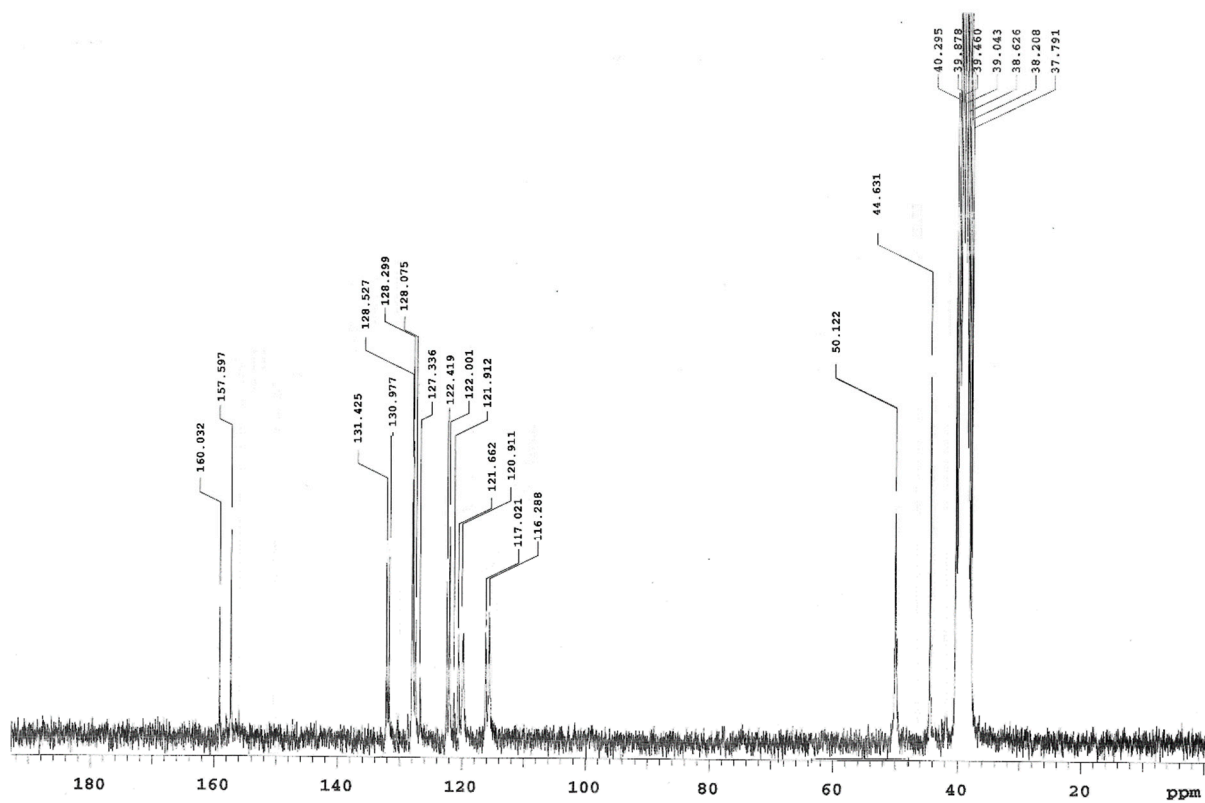

$^1\text{H}$  and  $^{13}\text{C}$  NMR spectra of 4-(2-cyanophenyl)piperazine-1-carboximidamide hydrochloride (**12**)

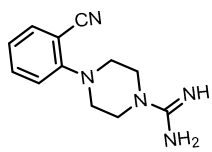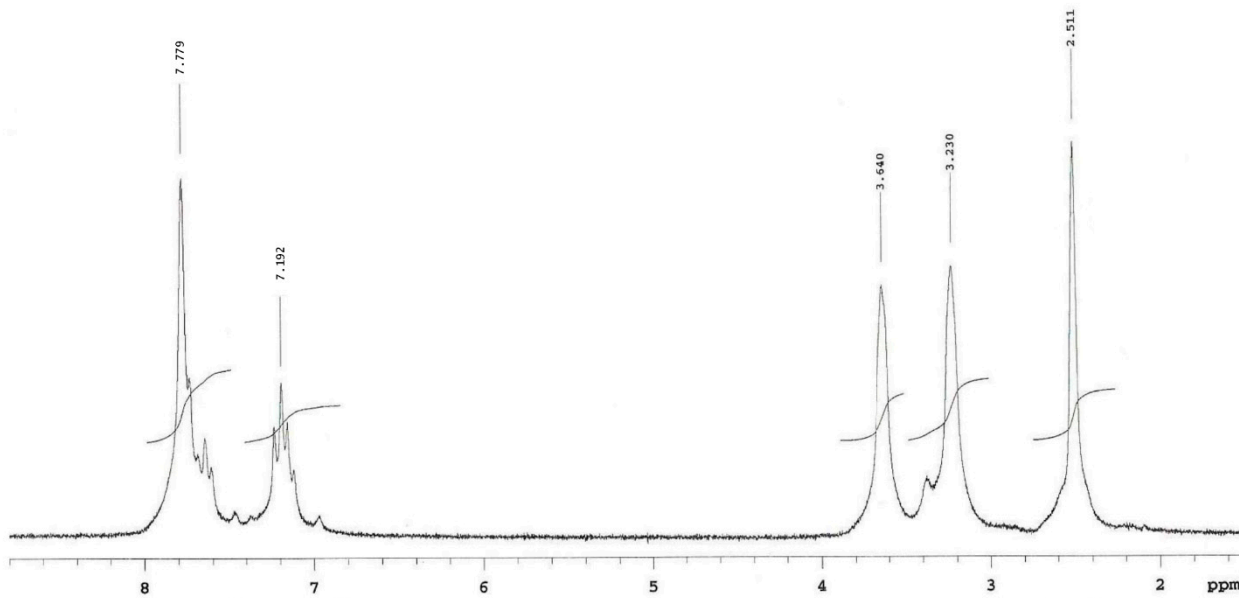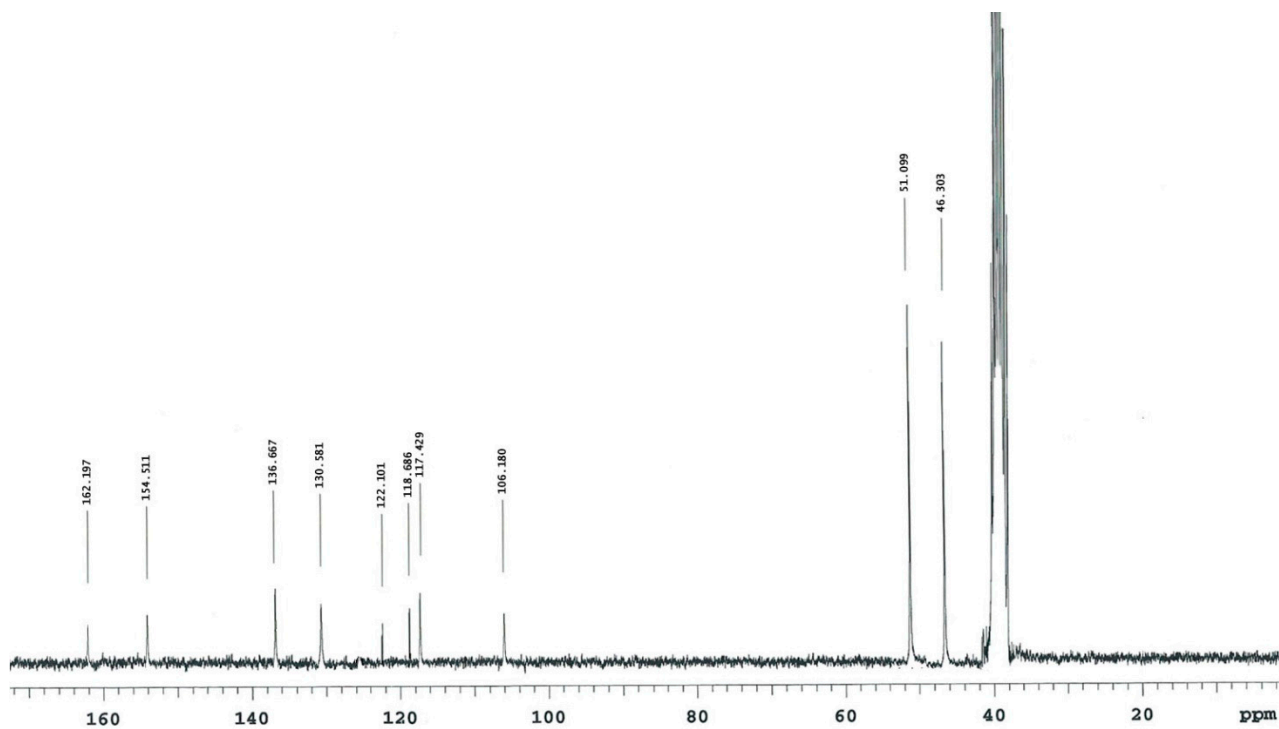

$^1\text{H}$  and  $^{13}\text{C}$  NMR spectra of 4-(2,3-Dichlorophenyl)piperazine-1-carboximidamide hydrochloride (15)

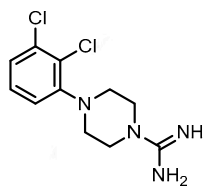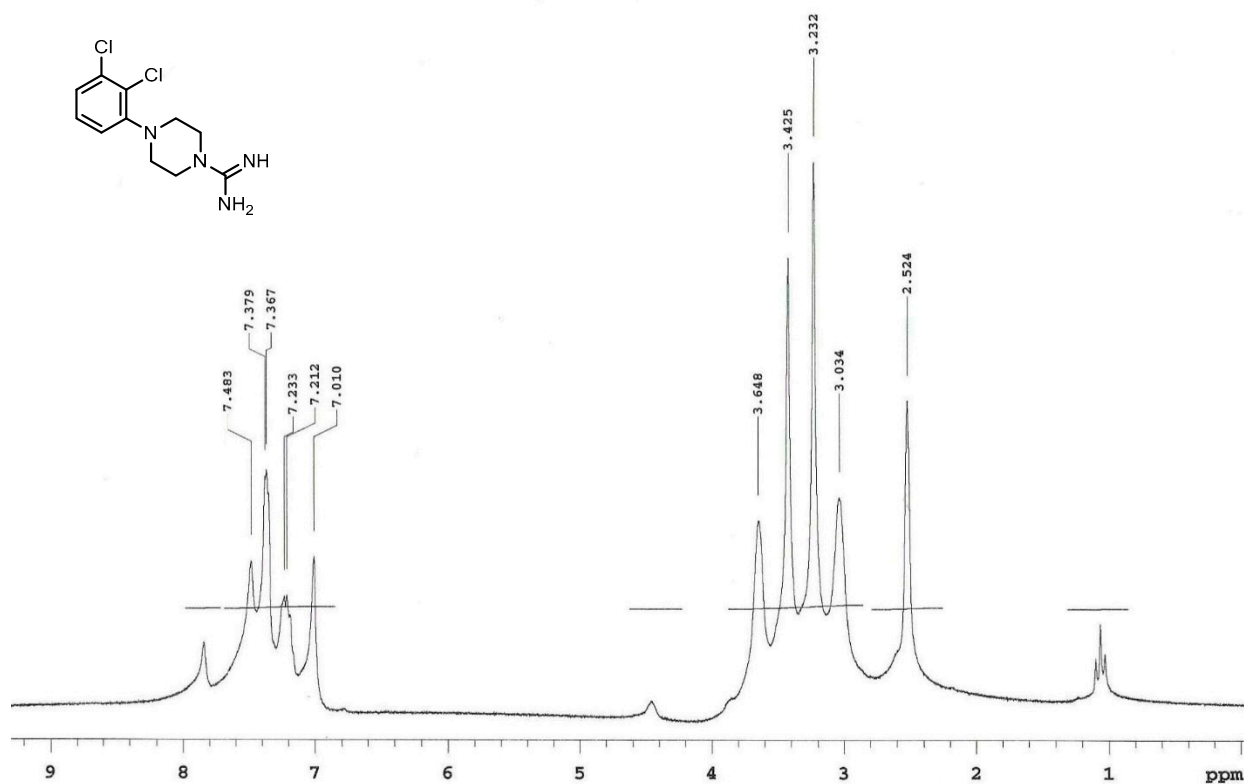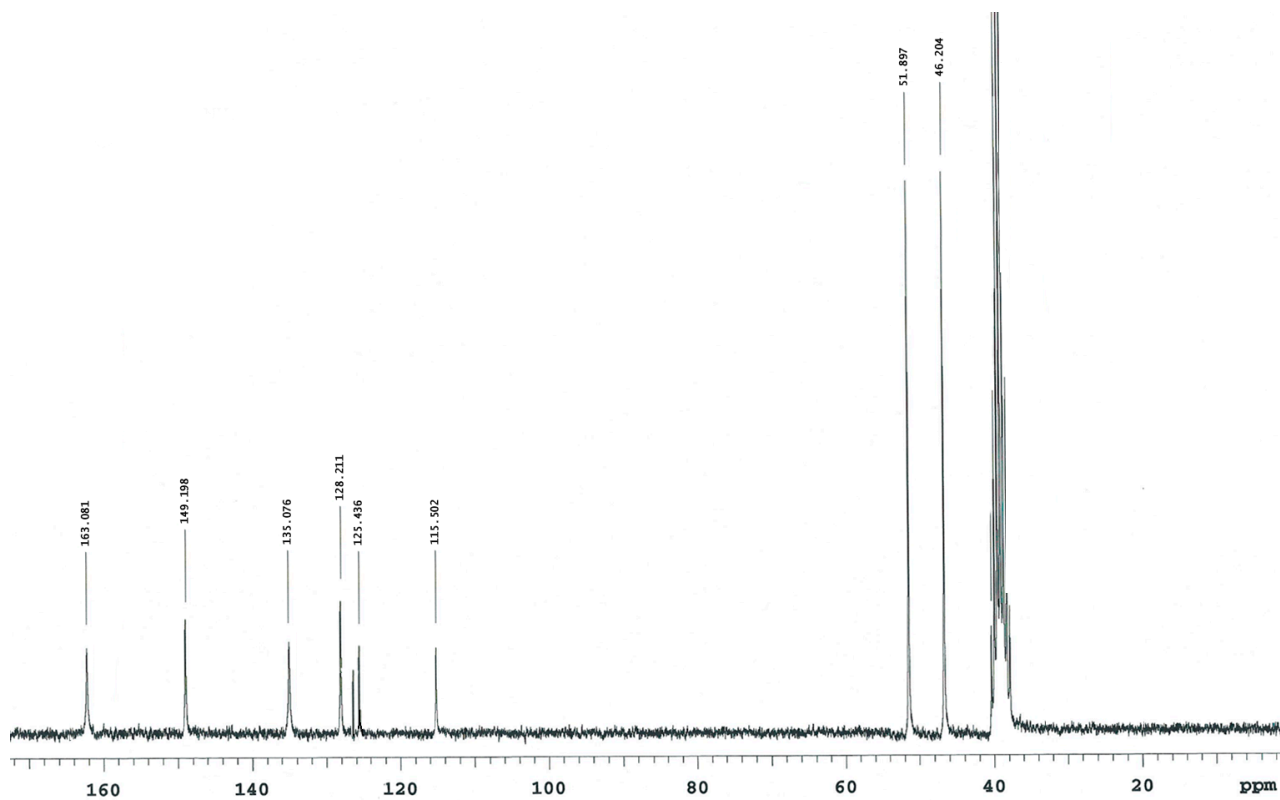

$^1\text{H}$  and  $^{13}\text{C}$  NMR spectra of 4-(3,4-Dichlorophenyl)piperazine-1-carboximidamide hydrochloride (16)

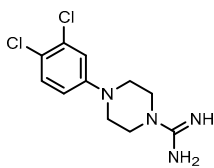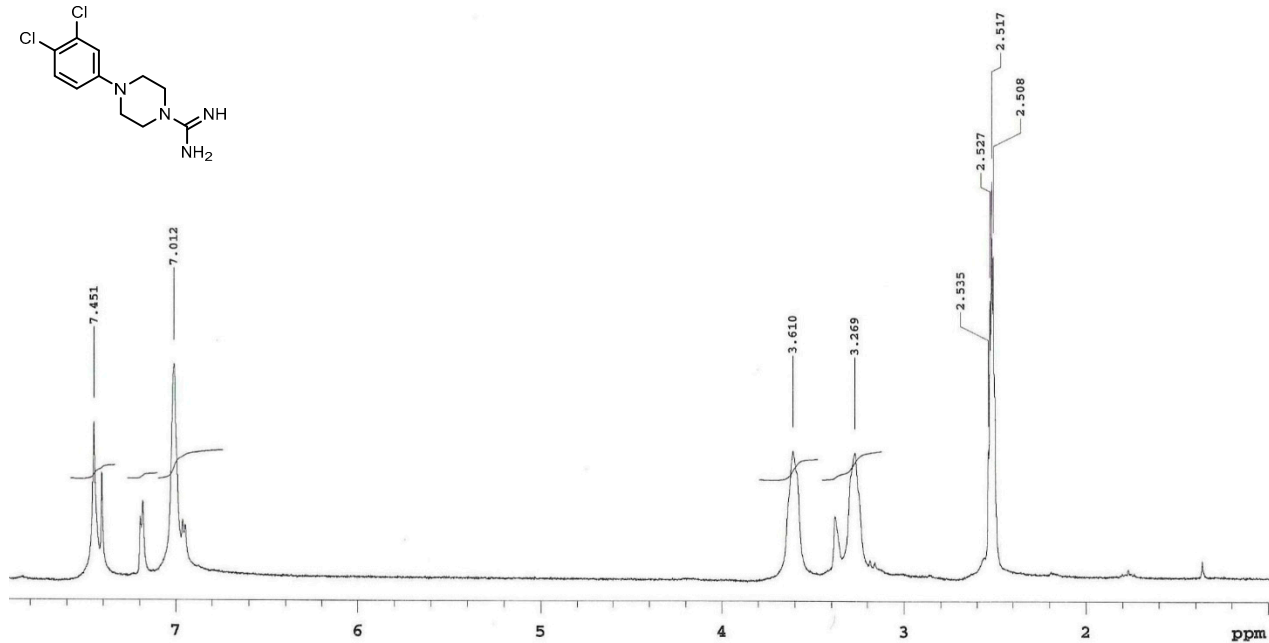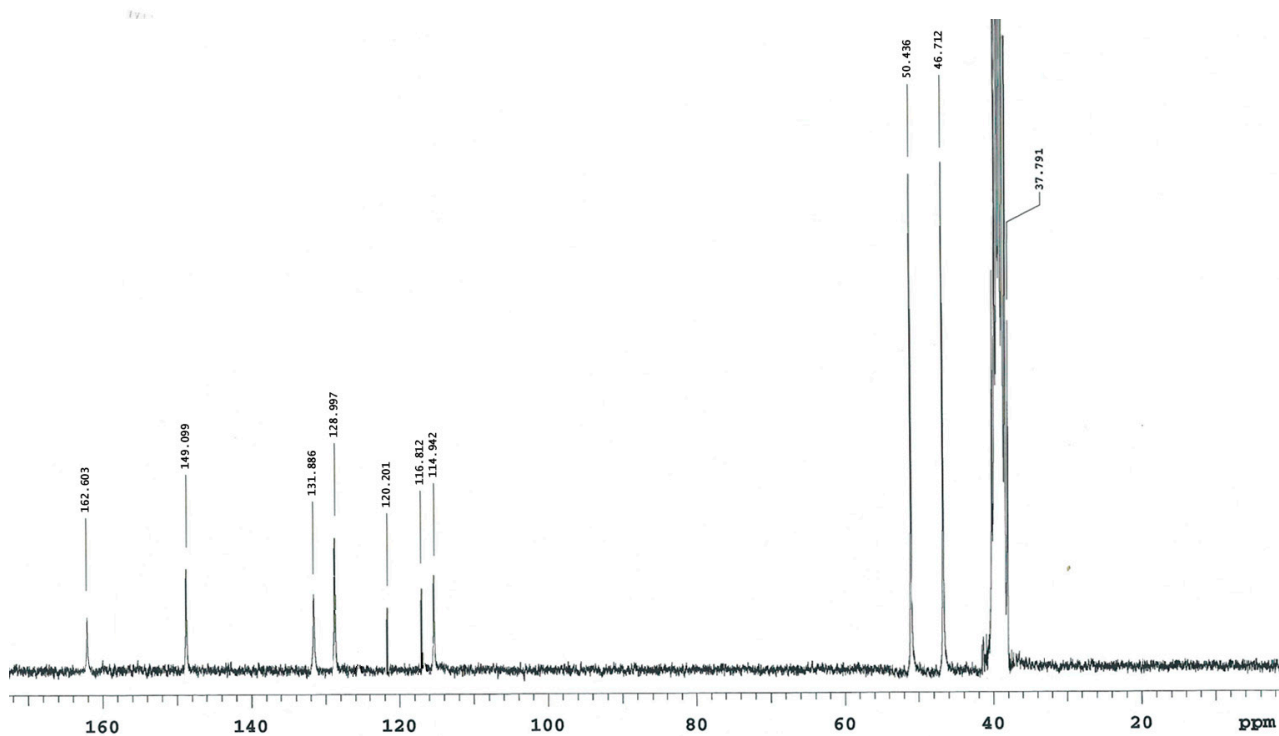

Supplement: s001 [file pharmaceuticals-13-00391-s001.pdf]
